# Supplementary material for: A high-performance ultraviolet solar-blind photodetector based on a β-Ga2O3 Schottky photodiode
Source: Royal Society of Chemistry journal article supplement (doi:10.1039/c9tc04912f), 2019-01-01
Supplement: c9tc04912f1.pdf [file c9tc04912f1.pdf]

### Supporting Information

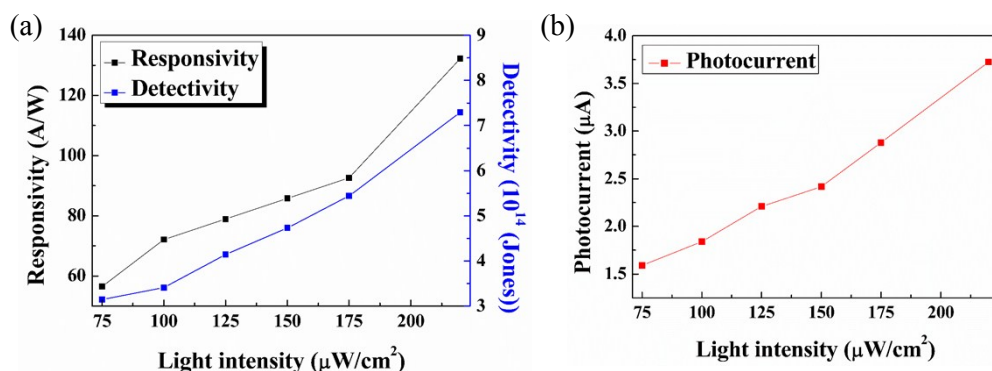

**Fig. S1.** (a) Responsivity and detectivity, and (b) photocurrent as a function of light intensity (75, 100, 125, 150, 175, 220  $\mu\text{W}/\text{cm}^2$ ) at voltage of 10 V.

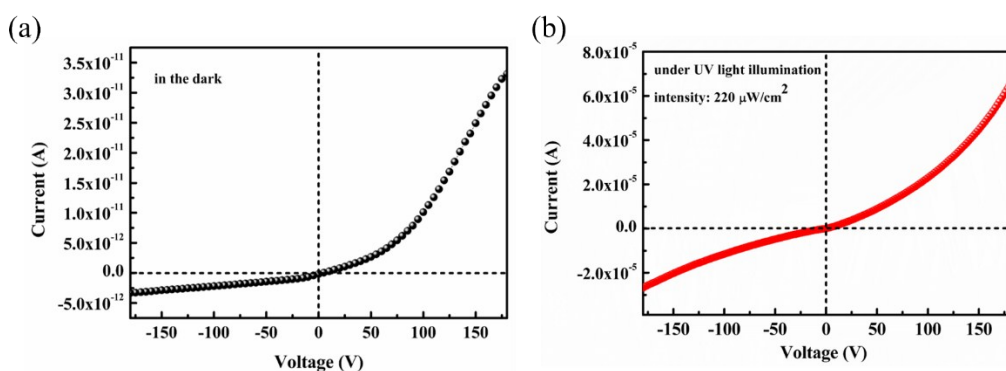

**Fig. S2.** The linear-scale I-V characteristic of the diode at biases from -180 V to 180 V (a) in the dark and (b) under UV light illumination.
